# Supplementary material for: Polyacrylic acid polymer modulates the UCST-type phase behavior of ionic liquid and water
Source: Royal Society of Chemistry journal article supplement (doi:10.1039/c2ra20251d), 2012-01-01
Supplement: c2ra20251d.pdf [file c2ra20251d.pdf]

## SUPPLEMENTARY INFORMATION

### Polyacrylic acid polymer modulates the UCST - type phase behavior of ionic liquid and water

Awanish Kumar, P. Madhusudhana Reddy and Pannuru Venkatesu\*

Department of Chemistry, University of Delhi, Delhi – 110 007.

#### Refractive Index Setup.

**Figure IS.** Schematic representation of experimental set up to determine the critical coexisting curve using refractive index measurements.

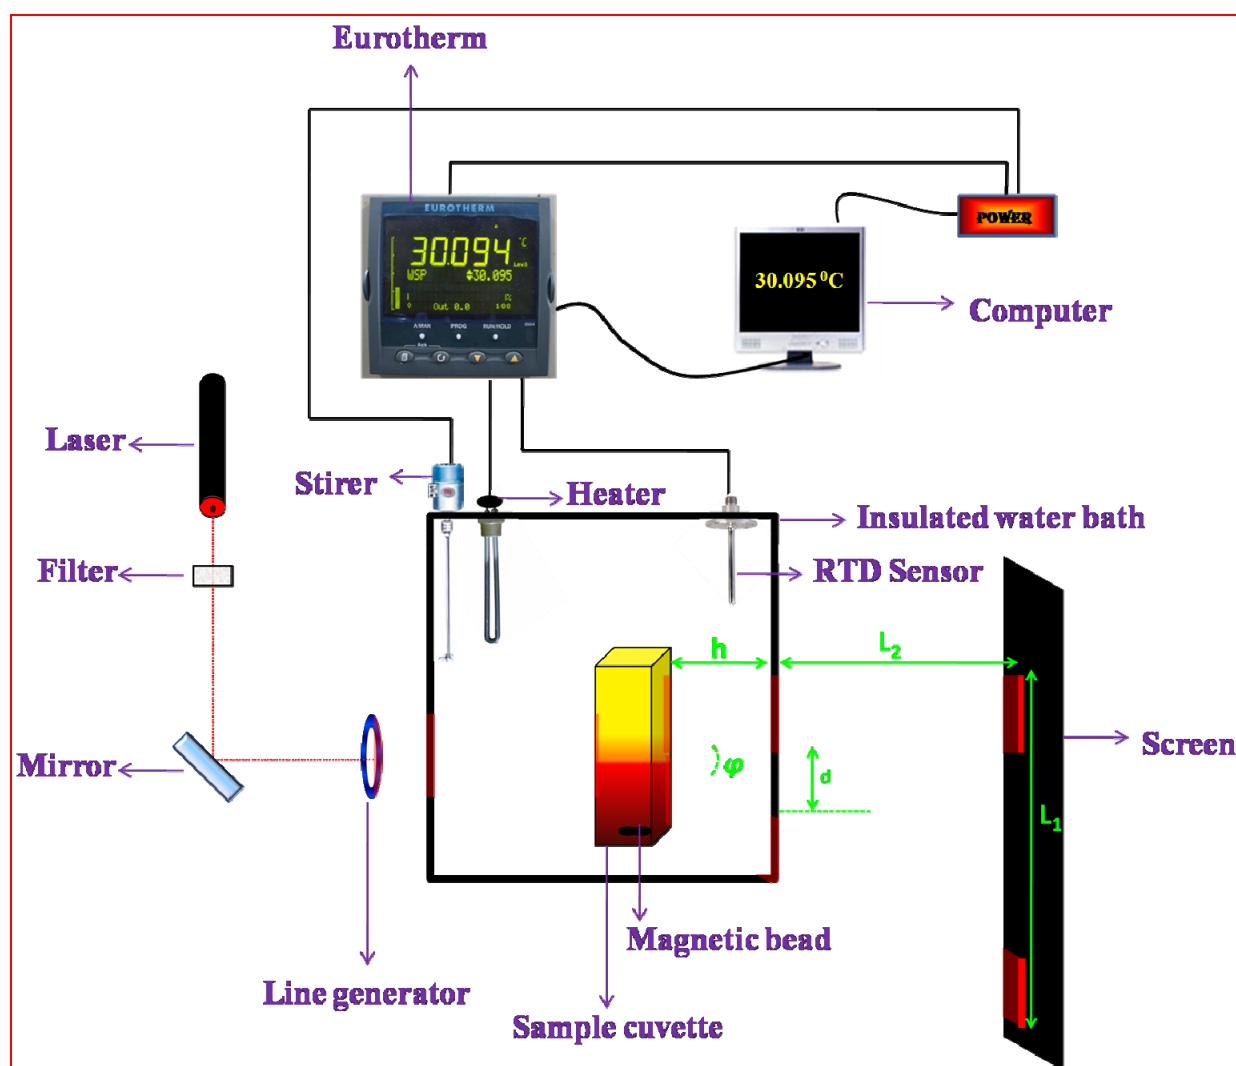

**Table IS.** Coexistence curve data for 1-Hexyl-3-methylimidazolium tetrafluoroborate and water with and without polyacrylic acid (PAA). The measured data are of the refractive indices of IL ( $n_1$ ) and water rich phase ( $n_2$ ), respectively, as a function of temperature ( $T$ ).

---

0 mg/ml of PAA in ILW;  $T_c=58.256\pm 0.002$  °C

---

| <b>T</b> | <b><math>n_1</math></b> | <b><math>n_2</math></b> |
|----------|-------------------------|-------------------------|
| 50.796   | 1.39130                 | 1.33208                 |
| 51.249   | 1.39055                 | 1.33194                 |
| 51.678   | 1.38967                 | 1.33250                 |
| 52.322   | 1.38863                 | 1.33334                 |
| 53.170   | 1.38755                 | 1.33467                 |
| 53.723   | 1.38668                 | 1.33556                 |
| 54.574   | 1.38509                 | 1.33717                 |
| 55.250   | 1.38367                 | 1.33868                 |
| 56.115   | 1.38130                 | 1.34121                 |
| 56.803   | 1.37767                 | 1.34338                 |
| 57.427   | 1.37393                 | 1.34619                 |
| 57.836   | 1.37149                 | 1.34865                 |
| 57.984   | 1.37003                 | 1.34988                 |
| 58.103   | 1.36834                 | 1.35112                 |
| 58.158   | 1.36615                 | 1.35141                 |
| 58.181   | 1.36491                 | 1.35193                 |
| 58.208   | 1.36403                 | 1.35316                 |
| 58.219   | 1.36338                 | 1.35262                 |

|        |         |         |
|--------|---------|---------|
| 58.238 | 1.36256 | 1.35395 |
| 58.256 | 1.36225 | 1.35414 |

---

0.5 mg/ml of PAA in ILW;  $T_c=57.126\pm0.002$  °C

---

| <b>T</b> | <b>n<sub>1</sub></b> | <b>n<sub>2</sub></b> |
|----------|----------------------|----------------------|
| 50.023   | 1.39190              | 1.33497              |
| 51.418   | 1.38937              | 1.33547              |
| 52.677   | 1.38703              | 1.33690              |
| 53.350   | 1.38558              | 1.33851              |
| 53.882   | 1.38395              | 1.33996              |
| 54.314   | 1.38287              | 1.34143              |
| 54.879   | 1.38108              | 1.34318              |
| 55.291   | 1.37963              | 1.34490              |
| 55.740   | 1.37837              | 1.34670              |
| 55.957   | 1.37729              | 1.34766              |
| 56.421   | 1.37566              | 1.35041              |
| 56.588   | 1.37439              | 1.35124              |
| 56.687   | 1.37313              | 1.35187              |
| 56.854   | 1.37205              | 1.35266              |
| 56.953   | 1.37026              | 1.35368              |
| 57.029   | 1.36767              | 1.35388              |
| 57.066   | 1.36592              | 1.35432              |
| 57.081   | 1.36589              | 1.35508              |
| 57.126   | 1.36502              | 1.35628              |

---

1.0 mg/ml of PAA in ILW;  $T_c=56.084\pm0.002$  °C

---

| <b>T</b> | <b>n<sub>1</sub></b> | <b>n<sub>2</sub></b> |
|----------|----------------------|----------------------|
| 50.043   | 1.38701              | 1.33291              |
| 51.008   | 1.38503              | 1.33415              |
| 52.019   | 1.38286              | 1.33672              |
| 52.608   | 1.38142              | 1.33852              |
| 52.973   | 1.38052              | 1.33960              |
| 53.548   | 1.37854              | 1.34159              |
| 54.058   | 1.37709              | 1.34357              |
| 54.489   | 1.37539              | 1.34510              |
| 54.908   | 1.37375              | 1.34681              |
| 55.150   | 1.37285              | 1.34806              |
| 55.459   | 1.37162              | 1.35033              |
| 55.689   | 1.37045              | 1.35197              |
| 55.898   | 1.36860              | 1.35422              |
| 55.945   | 1.36779              | 1.35464              |
| 55.985   | 1.36710              | 1.35495              |
| 56.054   | 1.36417              | 1.35652              |
| 56.028   | 1.36546              | 1.35615              |
| 56.055   | 1.36420              | 1.35722              |
| 56.084   | 1.36355              | 1.35809              |

1.5 mg/ml of PAA in ILW;  $T_c=55.168\pm 0.002$  °C

| <b>T</b> | <b>n<sub>1</sub></b> | <b>n<sub>2</sub></b> |
|----------|----------------------|----------------------|
| 50.628   | 1.38061              | 1.33592              |
| 51.265   | 1.37933              | 1.33697              |
| 52.077   | 1.37744              | 1.33858              |
| 52.686   | 1.37631              | 1.34067              |

|        |         |         |
|--------|---------|---------|
| 53.075 | 1.37534 | 1.34200 |
| 53.558 | 1.37431 | 1.34409 |
| 54.016 | 1.37235 | 1.34633 |
| 54.188 | 1.37128 | 1.34712 |
| 54.262 | 1.37089 | 1.34793 |
| 54.452 | 1.36956 | 1.34870 |
| 54.656 | 1.36817 | 1.35042 |
| 54.888 | 1.36688 | 1.35243 |
| 54.954 | 1.36632 | 1.35333 |
| 55.041 | 1.36523 | 1.35436 |
| 55.083 | 1.36449 | 1.35496 |
| 55.118 | 1.36288 | 1.35545 |
| 55.15  | 1.36200 | 1.35615 |
| 55.158 | 1.36120 | 1.35648 |
| 55.162 | 1.36038 | 1.35677 |
| 55.168 | 1.35977 | 1.35699 |
